# Supplementary material for: Cereblon negatively regulates TLR4 signaling through the attenuation of ubiquitination of TRAF6
Source: PubMed Central journal article supplement (PMC4973362; doi:10.1038/cddis.2016.226), 2016-07-28

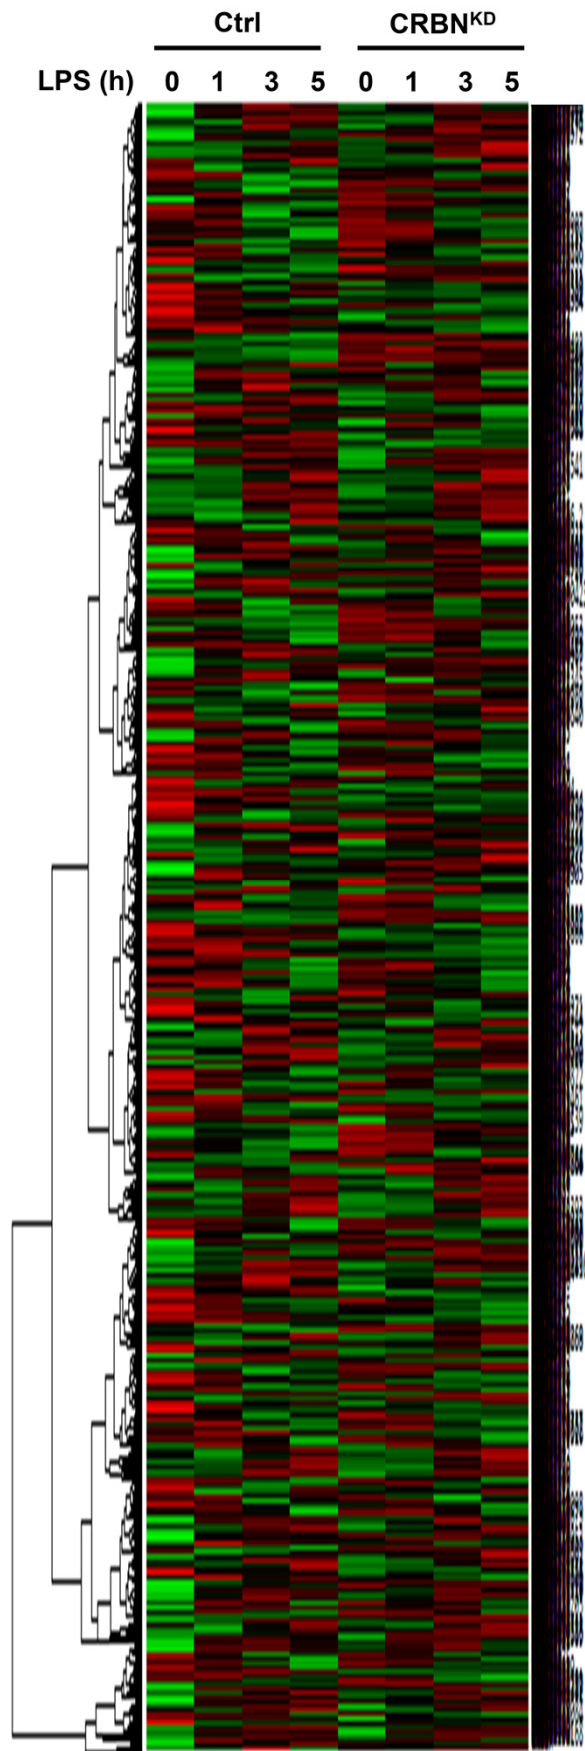

Supplement: cddis2016226x3.pdf [file cddis2016226x3.pdf]
